# Supplementary material for: Characterization of salA, syrF, and syrG Genes and Attendant Regulatory Networks Involved in Plant Pathogenesis by Pseudomonas syringae pv. syringae B728a
Source: PubMed Central journal article supplement (PMC4783005; doi:10.1371/journal.pone.0150234), 2016-03-08
Supplement: pone.0150234.s001.pdf [file pone.0150234.s001.pdf]

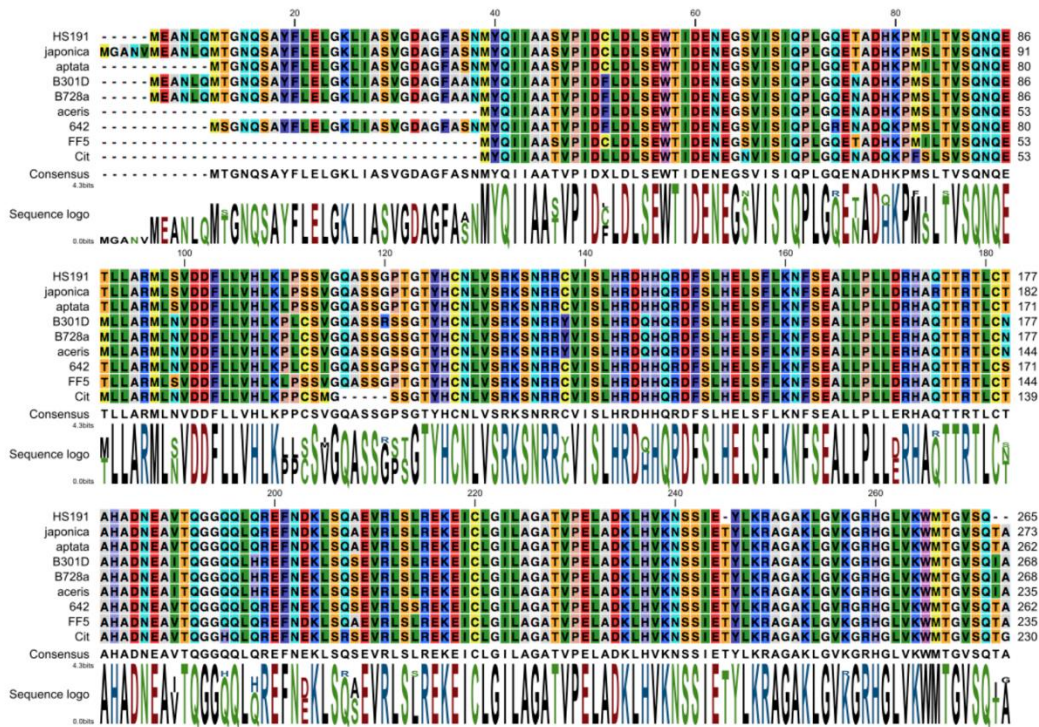

**S1 Fig. Sequence conservation of the SyrG regulatory protein in *Pseudomonas*.** SyrG is conserved only in *Pseudomonas syringae* genomospecies 2 and not in *P. syringae* pv. *tomato* DC3000 genomospecies 1. Strains include: *P. syringae* pv. *syringae* (*Pss*) strains B301D, HS191, B728a, 642, and FF5, *P. syringae* pv. *japonica* M301072; *P. syringae* pv. *aptata* DSM 50252, *P. syringae* pv. *aceris* M302273, and *P. syringae* strain Cit7. There is also a high level of conservation observed in the C-terminal region of the protein where there is a HTH DNA binding motif known to interact with the promoter regions of targeted genes. The sequence of SyrG in *Pss* B301D, a closely related strain to *Pss* B728a, is one amino acid different from the sequence in *Pss* B728a.
